# Supplementary material for: Orexin 2 Receptor Antagonism is Sufficient to Promote NREM and REM Sleep from Mouse to Man
Source: PubMed Central journal article supplement (PMC4891657; doi:10.1038/srep27147), 2016-06-03
Supplement: srep27147-s1.pdf [file srep27147-s1.pdf]

**Supplementary Information for:**

**Orexin 2 Receptor Antagonism is Sufficient to Promote NREM and  
REM Sleep from Mouse to Man**

Anthony L. Gotter<sup>1\*</sup>, Mark S. Forman<sup>2</sup>, Charles M. Harrell<sup>1</sup>, Joanne Stevens<sup>3</sup>, Vladimir Svetnik<sup>4</sup>,  
Ka Lai Yee<sup>5</sup>, Xiaodong Li<sup>5,#a</sup>, Anthony J. Roecker<sup>6</sup>, Steven V. Fox<sup>3</sup>, Pamela L. Tannenbaum<sup>3</sup>,  
Susan L. Garson<sup>1</sup>, Inge De Lepelierre<sup>2</sup>, Nicole Calder<sup>7,#b</sup>, Laura Rosen<sup>7,#c</sup>, Arie Struyk<sup>2</sup>, Paul J. Coleman<sup>6</sup>,  
W. Joseph Herring<sup>7</sup>, John J. Renger<sup>1</sup>, Christopher J. Winrow<sup>1</sup>

<sup>1</sup>Department of Neuroscience, Merck & Co. Inc., Kenilworth, NJ, USA

<sup>2</sup>Department of Translational Medicine, Merck & Co. Inc., Kenilworth, NJ, USA

<sup>3</sup>Department of in Vivo Pharmacology, Merck & Co. Inc., Kenilworth, NJ, USA

<sup>4</sup>Department of Biostatistics and Research Decision Sciences, Merck & Co. Inc., Kenilworth, NJ, USA

<sup>5</sup>Department of Pharmacokinetics Pharmacodynamics and Drug Metabolism, Merck & Co. Inc.,  
Kenilworth, NJ, USA

<sup>6</sup>Department of Medicinal Chemistry, Merck & Co. Inc., Kenilworth, NJ, USA

<sup>7</sup>Department of Clinical Neuroscience, Merck & Co. Inc., Kenilworth, NJ, USA

<sup>#a</sup>Current address: Global Biometric Sciences, Bristol-Myers Squibb, Hopewell, NJ

<sup>#b</sup>Current address: GlaxoSmithKline, Uxbridge, Middlesex, UK

<sup>#c</sup>Current address: AstraZeneca Neuroscience Innovative Medicines, Cambridge, MA

\* Corresponding author: Email: [anthony\\_gotter@merck.com](mailto:anthony_gotter@merck.com) (ALG)

**Supplementary Fig. 1.** Time course of MK-1064 induced PSG changes in canines.

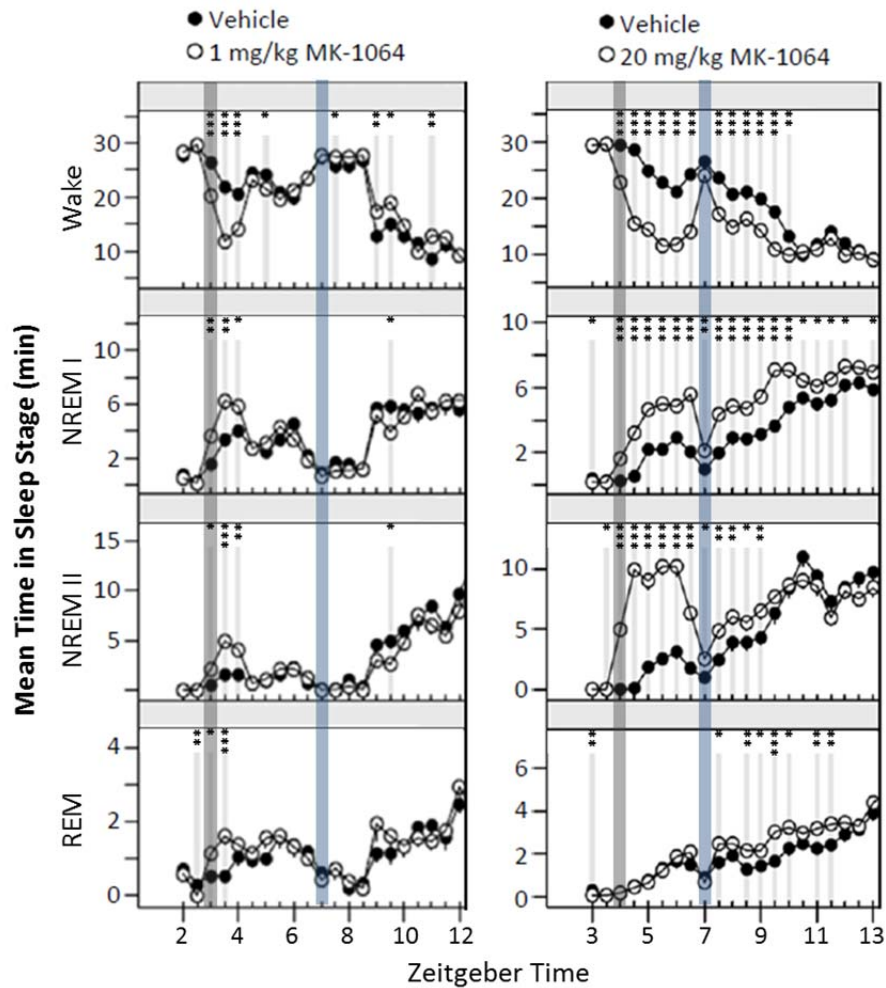

MK-1064 (open symbols) or vehicle (10 mM sodium citrate, closed symbols) was administered orally to telemetry implanted female beagles during the active phase at dosages of 1 mg/kg ( $n = 6$ , ZT 03:00, left panel) or 20 mg/kg ( $n = 8$ , ZT 04:00, right panel) (dose time indicated by vertical grey bar). Data shown represent the mean time spent in active wake, NREM I, NREM II, and REM sleep during 30-min intervals averaged from 5 consecutive days of vehicle and MK-1064 treatment occurring in a cross-over design (see Methods). Time points at which significant differences exist between vehicle and MK-1064 responses are indicated by grey vertical lines (\*, \*\*, \*\*\*:  $p < 0.05$ , 0.01, 0.001, respectively; linear mixed-effects model for repeated measures). Timing of required daily cage cleaning / water presentation is indicated by a blue vertical bar. Data presented in Figure 4a of the main article is a quantitation of the first 1 hour following administration seen in these representations. Note that while REM is not significantly increased at time points in the 3 hours following the 20 mg/kg administration, significant increases are observed at later time points.

**Supplementary Fig. 2.** MK-1064 increases mean TST across sleep stages in healthy subjects.

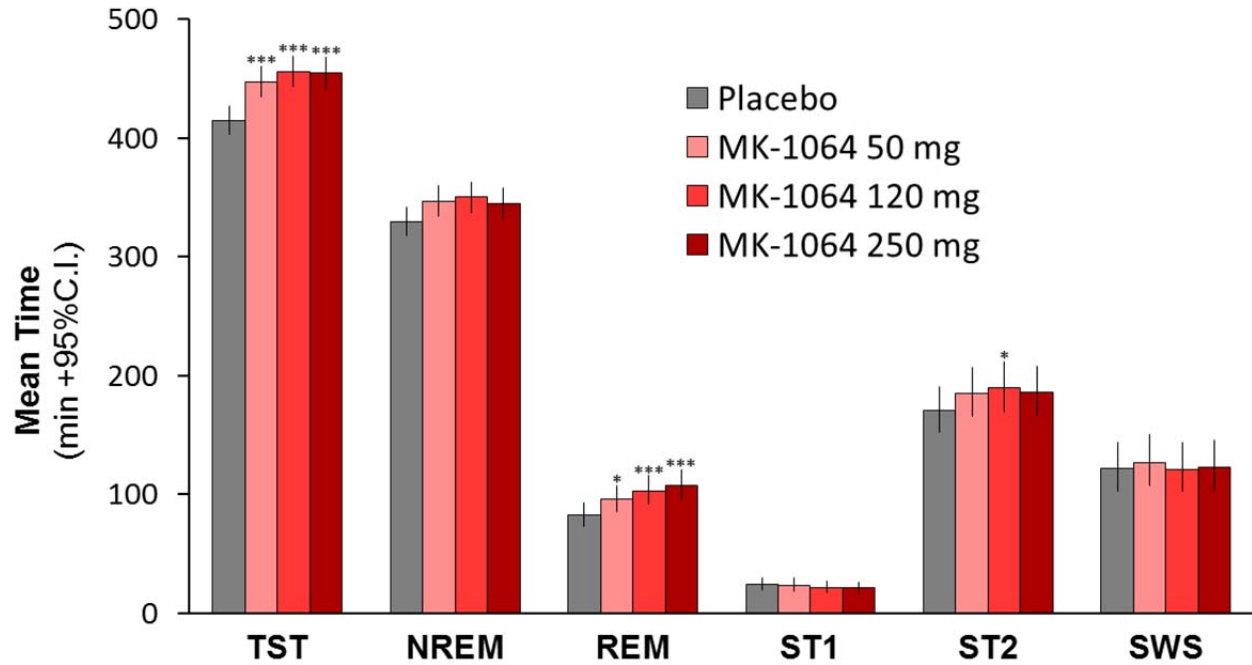

MK-1064 (50, 120, and 250 mg) or placebo was administered 1 hour prior to the normal resting phase in healthy subjects ( $n = 20$ ), and polysomnographic effects were monitored during the normal resting phase. Data are presented as the geometric mean (95% +/- confidence interval, C.I.) of time spent (in min) in total sleep (TST, total sleep time) and the indicated sleep stages (NREM, non-rapid eye movement; ST1, stage 1; ST2, stage 2; SWS, slow wave sleep) in minutes. Significant differences in the geometric mean ratios relative to placebo (% placebo) are indicated: \*, \*\*\*,  $p < 0.05$ ,  $< 0.001$ .

**Supplementary Table 1.** Incidence of adverse events occurring during placebo and MK-1064 single-ascending dose treatment in human subjects.

|                                                             | Placebo  |        | MK-1064<br>5 mg |        | MK-1064<br>10 mg |        | MK-1064<br>25 mg |        | MK-1064<br>50 mg |        | MK-1064<br>100 mg |        | MK-1064<br>200 mg |        | MK-1064<br>400 mg |        | MK-1064<br>750 mg |        |
|-------------------------------------------------------------|----------|--------|-----------------|--------|------------------|--------|------------------|--------|------------------|--------|-------------------|--------|-------------------|--------|-------------------|--------|-------------------|--------|
|                                                             | (N = 16) |        | (N = 6)         |        | (N = 6)          |        | (N = 6)          |        | (N = 6)          |        | (N = 6)           |        | (N = 6)           |        | (N = 6)           |        | (N = 6)           |        |
|                                                             | n        | (%)    | n               | (%)    | n                | (%)    | n                | (%)    | n                | (%)    | n                 | (%)    | n                 | (%)    | n                 | (%)    | n                 | (%)    |
| Subjects with one or more adverse events                    | 2        | (12.5) | 2               | (33.3) | 3                | (50.0) | 4                | (66.7) | 3                | (50.0) | 5                 | (83.3) | 5                 | (83.3) | 6                 | (100)  | 6                 | (100)  |
| Subjects with no adverse event                              | 14       | (87.5) | 4               | (66.7) | 3                | (50.0) | 2                | (33.3) | 3                | (50.0) | 1                 | (16.7) | 1                 | (16.7) | 0                 | (0.0)  | 0                 | (0.0)  |
| <b>Eye disorders</b>                                        | 0        | (0.0)  | 0               | (0.0)  | 0                | (0.0)  | 0                | (0.0)  | 0                | (0.0)  | 1                 | (16.7) | 0                 | (0.0)  | 0                 | (0.0)  | 0                 | (0.0)  |
| Vision blurred                                              | 0        | (0.0)  | 0               | (0.0)  | 0                | (0.0)  | 0                | (0.0)  | 0                | (0.0)  | 1                 | (16.7) | 0                 | (0.0)  | 0                 | (0.0)  | 0                 | (0.0)  |
| <b>Gastrointestinal disorders</b>                           | 0        | (0.0)  | 1               | (16.7) | 0                | (0.0)  | 0                | (0.0)  | 0                | (0.0)  | 0                 | (0.0)  | 0                 | (0.0)  | 0                 | (0.0)  | 0                 | (0.0)  |
| Abdominal distension                                        | 0        | (0.0)  | 1               | (16.7) | 0                | (0.0)  | 0                | (0.0)  | 0                | (0.0)  | 0                 | (0.0)  | 0                 | (0.0)  | 0                 | (0.0)  | 0                 | (0.0)  |
| <b>General disorders and administration-site conditions</b> | 0        | (0.0)  | 0               | (0.0)  | 0                | (0.0)  | 0                | (0.0)  | 0                | (0.0)  | 0                 | (0.0)  | 1                 | (16.7) | 0                 | (0.0)  | 0                 | (0.0)  |
| Fatigue                                                     | 0        | (0.0)  | 0               | (0.0)  | 0                | (0.0)  | 0                | (0.0)  | 0                | (0.0)  | 0                 | (0.0)  | 1                 | (16.7) | 0                 | (0.0)  | 0                 | (0.0)  |
| <b>Nervous system disorders</b>                             | 2        | (12.5) | 1               | (16.7) | 3                | (50.0) | 4                | (66.7) | 3                | (50.0) | 5                 | (83.3) | 5                 | (83.3) | 6                 | (100)  | 6                 | (100)  |
| Disturbance in attention                                    | 0        | (0.0)  | 0               | (0.0)  | 0                | (0.0)  | 0                | (0.0)  | 0                | (0.0)  | 0                 | (0.0)  | 1                 | (16.7) | 0                 | (0.0)  | 0                 | (0.0)  |
| Dizziness postural                                          | 0        | (0.0)  | 1               | (16.7) | 0                | (0.0)  | 0                | (0.0)  | 0                | (0.0)  | 1                 | (16.7) | 0                 | (0.0)  | 0                 | (0.0)  | 1                 | (16.7) |
| Headache                                                    | 1        | (6.3)  | 0               | (0.0)  | 3                | (50.0) | 0                | (0.0)  | 0                | (0.0)  | 0                 | (0.0)  | 0                 | (0.0)  | 3                 | (50.0) | 1                 | (16.7) |
| Somnolence                                                  | 1        | (6.3)  | 0               | (0.0)  | 2                | (33.3) | 4                | (66.7) | 3                | (50.0) | 5                 | (83.3) | 5                 | (83.3) | 6                 | (100)  | 6                 | (100)  |
| <b>Psychiatric disorders</b>                                | 0        | (0.0)  | 0               | (0.0)  | 0                | (0.0)  | 0                | (0.0)  | 0                | (0.0)  | 0                 | (0.0)  | 1                 | (16.7) | 0                 | (0.0)  | 0                 | (0.0)  |
| Euphoric mood                                               | 0        | (0.0)  | 0               | (0.0)  | 0                | (0.0)  | 0                | (0.0)  | 0                | (0.0)  | 0                 | (0.0)  | 1                 | (16.7) | 0                 | (0.0)  | 0                 | (0.0)  |
| <b>Reproductive system and breast disorders</b>             | 0        | (0.0)  | 0               | (0.0)  | 0                | (0.0)  | 0                | (0.0)  | 0                | (0.0)  | 0                 | (0.0)  | 0                 | (0.0)  | 0                 | (0.0)  | 1                 | (16.7) |
| Spontaneous penile erection                                 | 0        | (0.0)  | 0               | (0.0)  | 0                | (0.0)  | 0                | (0.0)  | 0                | (0.0)  | 0                 | (0.0)  | 0                 | (0.0)  | 0                 | (0.0)  | 1                 | (16.7) |
| <b>Vascular disorders</b>                                   | 0        | (0.0)  | 1               | (16.7) | 0                | (0.0)  | 0                | (0.0)  | 0                | (0.0)  | 0                 | (0.0)  | 0                 | (0.0)  | 0                 | (0.0)  | 0                 | (0.0)  |
| Orthostatic hypotension                                     | 0        | (0.0)  | 1               | (16.7) | 0                | (0.0)  | 0                | (0.0)  | 0                | (0.0)  | 0                 | (0.0)  | 0                 | (0.0)  | 0                 | (0.0)  | 0                 | (0.0)  |

Subjects are counted only once within a category regardless of the frequency of adverse events. The same subject may appear in different categories.

**Supplementary Table 2.** Incidence of adverse events occurring during placebo and MK-1064 administration for polysomnography analysis.

|                                                             | Placebo  |        | MK-1064<br>50 mg |        | MK-1064<br>120 mg |        | MK-1064<br>250 mg |        |
|-------------------------------------------------------------|----------|--------|------------------|--------|-------------------|--------|-------------------|--------|
|                                                             | (N = 20) |        | (N = 20)         |        | (N = 20)          |        | (N = 20)          |        |
|                                                             | n        | (%)    | n                | (%)    | n                 | (%)    | n                 | (%)    |
| Subjects with one or more adverse events                    | 3        | (15.0) | 4                | (20.0) | 4                 | (20.0) | 7                 | (35.0) |
| Subjects with no adverse event                              | 17       | (85.0) | 16               | (80.0) | 16                | (80.0) | 13                | (65.0) |
| <b>Ear and labyrinth disorders</b>                          | 0        | (0.0)  | 0                | (0.0)  | 0                 | (0.0)  | 1                 | (5.0)  |
| Tinnitus                                                    | 0        | (0.0)  | 0                | (0.0)  | 0                 | (0.0)  | 1                 | (5.0)  |
| <b>Eye disorders</b>                                        | 1        | (5.0)  | 0                | (0.0)  | 0                 | (0.0)  | 0                 | (0.0)  |
| Blepharospasm                                               | 1        | (5.0)  | 0                | (0.0)  | 0                 | (0.0)  | 0                 | (0.0)  |
| <b>Gastrointestinal disorders</b>                           | 0        | (0.0)  | 0                | (0.0)  | 0                 | (0.0)  | 1                 | (5.0)  |
| Diarrhea                                                    | 0        | (0.0)  | 0                | (0.0)  | 0                 | (0.0)  | 1                 | (5.0)  |
| <b>General disorders and administration-site conditions</b> | 0        | (0.0)  | 0                | (0.0)  | 0                 | (0.0)  | 1                 | (5.0)  |
| Chills                                                      | 0        | (0.0)  | 0                | (0.0)  | 0                 | (0.0)  | 1                 | (5.0)  |
| <b>Infections and infestations</b>                          | 0        | (0.0)  | 0                | (0.0)  | 0                 | (0.0)  | 1                 | (5.0)  |
| Viral upper respiratory tract infection                     | 0        | (0.0)  | 0                | (0.0)  | 0                 | (0.0)  | 1                 | (5.0)  |
| <b>Nervous system disorders</b>                             | 0        | (0.0)  | 2                | (10.0) | 2                 | (10.0) | 4                 | (20.0) |
| Dizziness                                                   | 0        | (0.0)  | 1                | (5.0)  | 0                 | (0.0)  | 1                 | (5.0)  |
| Dizziness postural                                          | 0        | (0.0)  | 0                | (0.0)  | 1                 | (5.0)  | 0                 | (0.0)  |
| Headache                                                    | 0        | (0.0)  | 1                | (5.0)  | 0                 | (0.0)  | 2                 | (10.0) |
| Paralysis                                                   | 0        | (0.0)  | 0                | (0.0)  | 0                 | (0.0)  | 1                 | (5.0)  |
| Somnolence                                                  | 0        | (0.0)  | 0                | (0.0)  | 1                 | (5.0)  | 0                 | (0.0)  |
| <b>Psychiatric disorders</b>                                | 0        | (0.0)  | 1                | (5.0)  | 2                 | (10.0) | 1                 | (5.0)  |
| Confusional state                                           | 0        | (0.0)  | 0                | (0.0)  | 0                 | (0.0)  | 0                 | (0.0)  |
| Nightmare                                                   | 0        | (0.0)  | 1                | (5.0)  | 2                 | (10.0) | 1                 | (5.0)  |
| <b>Respiratory, thoracic, and mediastinal disorders</b>     | 1        | (5.0)  | 1                | (5.0)  | 0                 | (0.0)  | 0                 | (0.0)  |
| Epistaxis                                                   | 0        | (0.0)  | 1                | (5.0)  | 0                 | (0.0)  | 0                 | (0.0)  |
| Oropharyngeal pain                                          | 1        | (5.0)  | 0                | (0.0)  | 0                 | (0.0)  | 0                 | (0.0)  |
| <b>Skin and subcutaneous tissue disorders</b>               | 1        | (5.0)  | 0                | (0.0)  | 0                 | (0.0)  | 0                 | (0.0)  |
| Hyperhidrosis                                               | 1        | (5.0)  | 0                | (0.0)  | 0                 | (0.0)  | 0                 | (0.0)  |
| <b>Vascular disorders</b>                                   | 0        | (0.0)  | 0                | (0.0)  | 1                 | (5.0)  | 0                 | (0.0)  |
| Hot flash                                                   | 0        | (0.0)  | 0                | (0.0)  | 1                 | (5.0)  | 0                 | (0.0)  |

Subjects are counted only once within a category regardless of the frequency of adverse events. The same subject may appear in different categories.

**Supplementary Table 3.** Pharmacokinetic parameter values for MK-1064 following administration of single oral doses to fasted healthy male subjects.

|                                                              | MK-1064 dose     |                  |                  |                  |                   |                   |                   |                        |
|--------------------------------------------------------------|------------------|------------------|------------------|------------------|-------------------|-------------------|-------------------|------------------------|
|                                                              | 5 mg<br>(N = 6)  | 10 mg<br>(N = 6) | 25 mg<br>(N = 6) | 50 mg<br>(N = 6) | 100 mg<br>(N = 6) | 150 mg<br>(N = 6) | 200 mg<br>(N = 6) | 250 mg<br>(N = 6)      |
| <b>AUC<sub>0-last</sub> (μM*h)<sup>a</sup></b>               | 0.94 (0.25)      | 1.67 (0.52)      | 5.42 (0.71)      | 9.89 (3.80)      | 23.12 (6.23)      | 25.92 (6.03)      | 53.37 (13.78)     | 57.10 (21.98)          |
| <b>AUC<sub>0-24h</sub> (μM*h)<sup>a</sup></b>                | 1.95 (0.25)      | 1.67 (0.52)      | 5.22 (0.80)      | 9.45 (3.73)      | 20.93 (6.27)      | 23.50 (6.22)      | 48.93 (14.31)     | 51.48 (19.06)          |
| <b>C<sub>max</sub> (μM)<sup>a</sup></b>                      | 0.37 (0.007)     | 0.42 (0.16)      | 1.06 (0.22)      | 2.09 (0.77)      | 3.60 (0.85)       | 3.83 (1.46)       | 6.78 (3.52)       | 8.28 (2.87)            |
| <b>T<sub>max</sub> (h)<sup>b</sup></b>                       | 1.0<br>(0.5–2.0) | 1.5<br>(0.5–2.0) | 1.5<br>(0.5–2.0) | 2.0<br>(1.0–2.0) | 2.0<br>(1.0–5.0)  | 1.0<br>(0.5–5.0)  | 2.0<br>(1.0–3.0)  | 2.0<br>(0.5–2.0)       |
| <b>T<sub>1/2 α</sub> (h)<sup>c</sup></b>                     | 1.6 (0.2)        | 2.5 (0.9)        | 2.6 (0.2)        | 2.5 (0.8)        | 3.2 (0.9)         | 4.0 (1.8)         | 3.7 (1.7)         | 3.6 (1.6)              |
| <b>Apparent terminal<br/>t<sub>1/2</sub> (h)<sup>c</sup></b> | NA               | NA               | NA               | NA               | 11.1 (5.0)        | 6.8 (3.2)         | 7.5 (1.6)         | 8.6 (2.7) <sup>d</sup> |

AUC, area under the concentration-time curve; C<sub>max</sub>, maximum plasma concentration; T<sub>max</sub>, time at which maximum plasma concentration was reached; T<sub>1/2</sub>, half-life; ND, not determined (lack of terminal phase data precluded calculation of apparent terminal t<sub>1/2</sub>).

<sup>a</sup>Mean (SD); <sup>b</sup>Median (minimum-maximum); <sup>c</sup>Harmonic mean (pseudo SD); <sup>d</sup>N = 5.
